# Supplementary material for: The importance of local settings: within-year variability in seawater temperature at South Bay, Western Antarctic Peninsula
Source: PeerJ journal article supplement (doi:10.7717/peerj.4289), 2018-01-18

# YELCHO STATION Bay\_PY1\_10 m

## Daily data

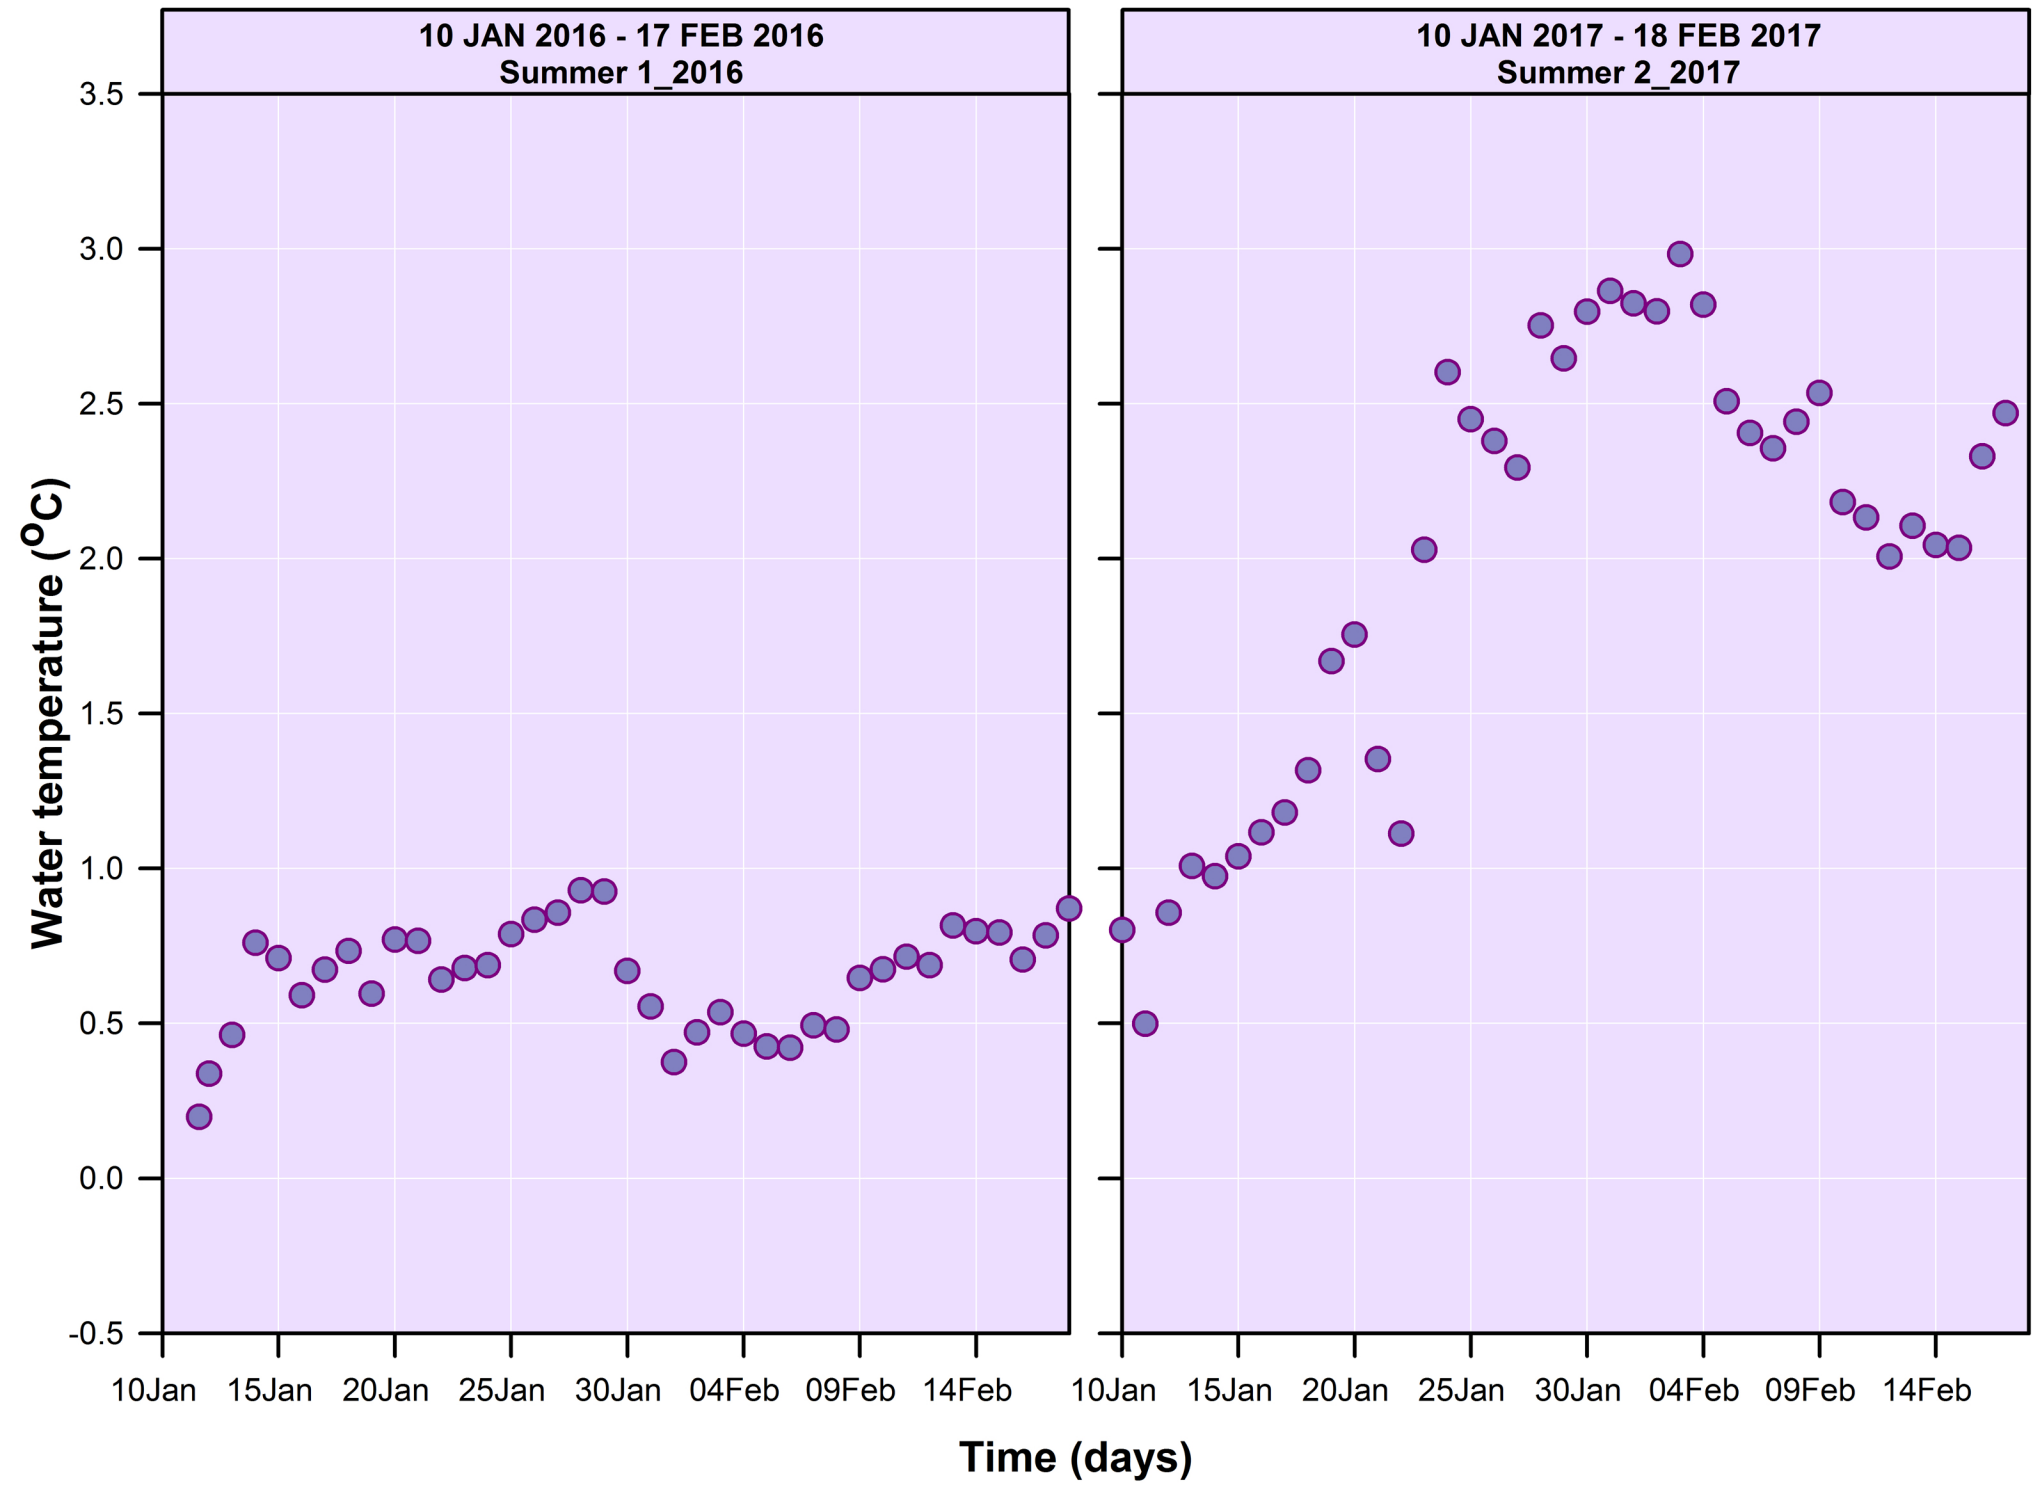

Supplement: SF1.pdf [file SF1.pdf]
