# Supplementary material for: The importance of local settings: within-year variability in seawater temperature at South Bay, Western Antarctic Peninsula
Source: PeerJ. 2018 Jan 18;6:e4289. doi: 10.7717/peerj.4289 (PMC5776021; doi:10.7717/peerj.4289)
Supplement: Supplemental Information 6 [file peerj-06-4289-s006.csv]

DatiY410	temyel410
2016-01-19-15-00	0.893
2016-01-19-17-00	1.112
2016-01-19-19-00	1.112
2016-01-19-21-00	1.003
2016-01-19-23-00	0.893
2016-01-20-01-00	1.003
2016-01-20-03-00	0.893
2016-01-20-05-00	0.893
2016-01-20-07-00	0.893
2016-01-20-09-00	0.893
2016-01-20-11-00	0.893
2016-01-20-13-00	0.893
2016-01-20-15-00	0.893
2016-01-20-17-00	1.003
2016-01-20-19-00	1.112
2016-01-20-21-00	1.003
2016-01-20-23-00	1.003
2016-01-21-01-00	1.003
2016-01-21-03-00	1.003
2016-01-21-05-00	1.003
2016-01-21-07-00	0.893
2016-01-21-09-00	0.893
2016-01-21-11-00	0.893
2016-01-21-13-00	0.893
2016-01-21-15-00	0.784
2016-01-21-17-00	0.674
2016-01-21-19-00	0.674
2016-01-21-21-00	0.674
2016-01-21-23-00	0.674
2016-01-22-01-00	0.674
2016-01-22-03-00	0.674
2016-01-22-05-00	0.674
2016-01-22-07-00	0.563
2016-01-22-09-00	0.674
2016-01-22-11-00	0.674
2016-01-22-13-00	0.784
2016-01-22-15-00	0.784
2016-01-22-17-00	0.674
2016-01-22-19-00	0.563
2016-01-22-21-00	0.453
2016-01-22-23-00	0.453
2016-01-23-01-00	0.563
2016-01-23-03-00	0.563
2016-01-23-05-00	0.453
2016-01-23-07-00	0.563
2016-01-23-09-00	0.563
2016-01-23-11-00	0.563
2016-01-23-13-00	0.784
2016-01-23-15-00	0.784
2016-01-23-17-00	0.674
2016-01-23-19-00	0.674
2016-01-23-21-00	0.674
2016-01-23-23-00	0.674
2016-01-24-01-00	0.563
2016-01-24-03-00	0.674
2016-01-24-05-00	0.674
2016-01-24-07-00	0.563
2016-01-24-09-00	0.563
2016-01-24-11-00	0.784
2016-01-24-13-00	1.003
2016-01-24-15-00	0.893
2016-01-24-17-00	1.003
2016-01-24-19-00	0.893
2016-01-24-21-00	0.784
2016-01-24-23-00	0.784
2016-01-25-01-00	0.784
2016-01-25-03-00	0.784
2016-01-25-05-00	0.784
2016-01-25-07-00	0.784
2016-01-25-09-00	0.893
2016-01-25-11-00	1.003
2016-01-25-13-00	1.112
2016-01-25-15-00	1.112
2016-01-25-17-00	1.112
2016-01-25-19-00	1.112
2016-01-25-21-00	1.112
2016-01-25-23-00	1.003
2016-01-26-01-00	1.003
2016-01-26-03-00	1.003
2016-01-26-05-00	0.893
2016-01-26-07-00	1.003
2016-01-26-09-00	1.003
2016-01-26-11-00	1.003
2016-01-26-13-00	1.003
2016-01-26-15-00	1.003
2016-01-26-17-00	0.893
2016-01-26-19-00	0.893
2016-01-26-21-00	1.003
2016-01-26-23-00	0.893
2016-01-27-01-00	0.893
2016-01-27-03-00	0.893
2016-01-27-05-00	0.893
2016-01-27-07-00	0.893
2016-01-27-09-00	0.893
2016-01-27-11-00	1.003
2016-01-27-13-00	1.112
2016-01-27-15-00	1.003
2016-01-27-17-00	1.003
2016-01-27-19-00	0.893
2016-01-27-21-00	1.003
2016-01-27-23-00	1.003
2016-01-28-01-00	1.003
2016-01-28-03-00	1.003
2016-01-28-05-00	1.003
2016-01-28-07-00	0.893
2016-01-28-09-00	0.784
2016-01-28-11-00	0.784
2016-01-28-13-00	0.784
2016-01-28-15-00	0.893
2016-01-28-17-00	0.893
2016-01-28-19-00	0.893
2016-01-28-21-00	1.003
2016-01-28-23-00	1.003
2016-01-29-01-00	1.003
2016-01-29-03-00	0.893
2016-01-29-05-00	0.893
2016-01-29-07-00	0.893
2016-01-29-09-00	1.003
2016-01-29-11-00	1.003
2016-01-29-13-00	1.112
2016-01-29-15-00	1.003
2016-01-29-17-00	1.003
2016-01-29-19-00	1.003
2016-01-29-21-00	0.563
2016-01-29-23-00	0.453
2016-01-30-01-00	0.563
2016-01-30-03-00	0.563
2016-01-30-05-00	0.563
2016-01-30-07-00	0.674
2016-01-30-09-00	0.674
2016-01-30-11-00	0.563
2016-01-30-13-00	0.674
2016-01-30-15-00	0.674
2016-01-30-17-00	0.563
2016-01-30-19-00	0.674
2016-01-30-21-00	0.674
2016-01-30-23-00	0.563
2016-01-31-01-00	0.563
2016-01-31-03-00	0.563
2016-01-31-05-00	0.563
2016-01-31-07-00	0.563
2016-01-31-09-00	0.563
2016-01-31-11-00	0.563
2016-01-31-13-00	0.674
2016-01-31-15-00	0.674
2016-01-31-17-00	0.563
2016-01-31-19-00	0.674
2016-01-31-21-00	0.563
2016-01-31-23-00	0.674
2016-02-01-01-00	0.674
2016-02-01-03-00	0.674
2016-02-01-05-00	0.674
2016-02-01-07-00	0.674
2016-02-01-09-00	0.674
2016-02-01-11-00	0.563
2016-02-01-13-00	0.674
2016-02-01-15-00	0.674
2016-02-01-17-00	0.674
2016-02-01-19-00	0.674
2016-02-01-21-00	0.674
2016-02-01-23-00	0.563
2016-02-02-01-00	0.563
2016-02-02-03-00	0.563
2016-02-02-05-00	0.563
2016-02-02-07-00	0.563
2016-02-02-09-00	0.563
2016-02-02-11-00	0.563
2016-02-02-13-00	0.563
2016-02-02-15-00	0.674
2016-02-02-17-00	0.563
2016-02-02-19-00	0.563
2016-02-02-21-00	0.674
2016-02-02-23-00	0.784
2016-02-03-01-00	0.784
2016-02-03-03-00	0.784
2016-02-03-05-00	0.784
2016-02-03-07-00	0.784
2016-02-03-09-00	0.674
2016-02-03-11-00	0.784
2016-02-03-13-00	0.674
2016-02-03-15-00	0.674
2016-02-03-17-00	0.674
2016-02-03-19-00	0.674
2016-02-03-21-00	0.674
2016-02-03-23-00	0.674
2016-02-04-01-00	0.674
2016-02-04-03-00	0.784
2016-02-04-05-00	0.784
2016-02-04-07-00	0.784
2016-02-04-09-00	0.784
2016-02-04-11-00	0.674
2016-02-04-13-00	0.674
2016-02-04-15-00	0.674
2016-02-04-17-00	0.674
2016-02-04-19-00	0.674
2016-02-04-21-00	0.674
2016-02-04-23-00	0.674
2016-02-05-01-00	0.674
2016-02-05-03-00	0.563
2016-02-05-05-00	0.563
2016-02-05-07-00	0.563
2016-02-05-09-00	0.563
2016-02-05-11-00	0.563
2016-02-05-13-00	0.563
2016-02-05-15-00	0.563
2016-02-05-17-00	0.563
2016-02-05-19-00	0.563
2016-02-05-21-00	0.563
2016-02-05-23-00	0.563
2016-02-06-01-00	0.453
2016-02-06-03-00	0.563
2016-02-06-05-00	0.453
2016-02-06-07-00	0.453
2016-02-06-09-00	0.453
2016-02-06-11-00	0.563
2016-02-06-13-00	0.563
2016-02-06-15-00	0.893
2016-02-06-17-00	0.674
2016-02-06-19-00	0.674
2016-02-06-21-00	0.674
2016-02-06-23-00	0.674
2016-02-07-01-00	0.674
2016-02-07-03-00	0.784
2016-02-07-05-00	0.674
2016-02-07-07-00	0.674
2016-02-07-09-00	0.674
2016-02-07-11-00	0.674
2016-02-07-13-00	0.674
2016-02-07-15-00	0.674
2016-02-07-17-00	0.563
2016-02-07-19-00	0.674
2016-02-07-21-00	0.674
2016-02-07-23-00	0.563
2016-02-08-01-00	0.563
2016-02-08-03-00	0.563
2016-02-08-05-00	0.563
2016-02-08-07-00	0.563
2016-02-08-09-00	0.453
2016-02-08-11-00	0.563
2016-02-08-13-00	0.563
2016-02-08-15-00	0.893
2016-02-08-17-00	0.563
2016-02-08-19-00	0.453
2016-02-08-21-00	0.563
2016-02-08-23-00	0.563
2016-02-09-01-00	0.674
2016-02-09-03-00	0.674
2016-02-09-05-00	0.563
2016-02-09-07-00	0.674
2016-02-09-09-00	0.674
2016-02-09-11-00	0.674
2016-02-09-13-00	0.674
2016-02-09-15-00	0.674
2016-02-09-17-00	0.674
2016-02-09-19-00	0.893
2016-02-09-21-00	0.784
2016-02-09-23-00	0.784
2016-02-10-01-00	0.784
2016-02-10-03-00	0.784
2016-02-10-05-00	0.784
2016-02-10-07-00	0.784
2016-02-10-09-00	0.784
2016-02-10-11-00	0.784
2016-02-10-13-00	0.784
2016-02-10-15-00	0.893
2016-02-10-17-00	0.893
2016-02-10-19-00	0.784
2016-02-10-21-00	0.784
2016-02-10-23-00	0.784
2016-02-11-01-00	0.893
2016-02-11-03-00	0.893
2016-02-11-05-00	0.784
2016-02-11-07-00	0.674
2016-02-11-09-00	0.674
2016-02-11-11-00	0.674
2016-02-11-13-00	0.674
2016-02-11-15-00	0.784
2016-02-11-17-00	0.893
2016-02-11-19-00	0.784
2016-02-11-21-00	0.674
2016-02-11-23-00	0.674
2016-02-12-01-00	0.674
2016-02-12-03-00	0.784
2016-02-12-05-00	0.784
2016-02-12-07-00	0.674
2016-02-12-09-00	0.674
2016-02-12-11-00	0.674
2016-02-12-13-00	0.674
2016-02-12-15-00	0.784
2016-02-12-17-00	0.784
2016-02-12-19-00	0.784
2016-02-12-21-00	0.893
2016-02-12-23-00	0.784
2016-02-13-01-00	0.784
2016-02-13-03-00	0.784
2016-02-13-05-00	0.893
2016-02-13-07-00	0.893
2016-02-13-09-00	0.784
2016-02-13-11-00	0.784
2016-02-13-13-00	0.784
2016-02-13-15-00	0.784
2016-02-13-17-00	0.784
2016-02-13-19-00	0.784
2016-02-13-21-00	0.893
2016-02-13-23-00	0.893
2016-02-14-01-00	0.784
2016-02-14-03-00	0.784
2016-02-14-05-00	0.784
2016-02-14-07-00	0.784
2016-02-14-09-00	0.784
2016-02-14-11-00	0.784
2016-02-14-13-00	0.784
2016-02-14-15-00	0.784
2016-02-14-17-00	0.784
2016-02-14-19-00	0.784
2016-02-14-21-00	0.784
2016-02-14-23-00	0.893
2016-02-15-01-00	0.893
2016-02-15-03-00	0.784
2016-02-15-05-00	0.893
2016-02-15-07-00	0.674
2016-02-15-09-00	0.674
2016-02-15-11-00	0.784
2016-02-15-13-00	0.784
2016-02-15-15-00	0.784
2016-02-15-17-00	0.784
2016-02-15-19-00	0.893
2016-02-15-21-00	0.784
2016-02-15-23-00	0.784
2016-02-16-01-00	0.784
2016-02-16-03-00	0.784
2016-02-16-05-00	0.784
2016-02-16-07-00	0.784
2016-02-16-09-00	0.784
2016-02-16-11-00	0.784
2016-02-16-13-00	0.893
2016-02-16-15-00	0.893
2016-02-16-17-00	0.893
2016-02-16-19-00	0.893
2016-02-16-21-00	0.893
2016-02-16-23-00	0.893
2016-02-17-01-00	0.784
2016-02-17-03-00	0.893
2016-02-17-05-00	0.893
2016-02-17-07-00	0.893
2016-02-17-09-00	0.784
2016-02-17-11-00	0.563
2016-02-17-13-00	0.893
2016-02-17-15-00	0.784
2016-02-17-17-00	0.784
2016-02-17-19-00	0.784
2016-02-17-21-00	0.784
2016-02-17-23-00	0.893
2016-02-18-01-00	0.893
2016-02-18-03-00	0.893
2016-02-18-05-00	0.784
2016-02-18-07-00	0.674
2016-02-18-09-00	0.674
2016-02-18-11-00	0.674
2016-02-18-13-00	0.563
2016-02-18-15-00	0.453
2016-02-18-17-00	0.453
2016-02-18-19-00	0.784
2016-02-18-21-00	0.563
2016-02-18-23-00	0.563
2016-02-19-01-00	0.563
2016-02-19-03-00	0.674
2016-02-19-05-00	0.674
2016-02-19-07-00	0.674
2016-02-19-09-00	0.674
2016-02-19-11-00	0.674
2016-02-19-13-00	0.563
2016-02-19-15-00	0.563
2016-02-19-17-00	0.674
2016-02-19-19-00	0.674
2016-02-19-21-00	0.674
2016-02-19-23-00	0.674
2016-02-20-01-00	0.674
2016-02-20-03-00	0.674
2016-02-20-05-00	0.784
2016-02-20-07-00	0.674
2016-02-20-09-00	0.674
2016-02-20-11-00	0.674
2016-02-20-13-00	0.784
2016-02-20-15-00	0.784
2016-02-20-17-00	0.784
2016-02-20-19-00	0.784
2016-02-20-21-00	0.784
2016-02-20-23-00	0.674
2016-02-21-01-00	0.784
2016-02-21-03-00	0.784
2016-02-21-05-00	0.784
2016-02-21-07-00	0.674
2016-02-21-09-00	0.674
2016-02-21-11-00	0.674
2016-02-21-13-00	0.674
2016-02-21-15-00	0.784
2016-02-21-17-00	0.784
2016-02-21-19-00	0.674
2016-02-21-21-00	0.784
2016-02-21-23-00	0.674
2016-02-22-01-00	0.674
2016-02-22-03-00	0.674
2016-02-22-05-00	0.784
2016-02-22-07-00	0.784
2016-02-22-09-00	0.674
2016-02-22-11-00	0.784
2016-02-22-13-00	0.674
2016-02-22-15-00	0.784
2016-02-22-17-00	0.893
2016-02-22-19-00	0.893
2016-02-22-21-00	0.784
2016-02-22-23-00	0.784
2016-02-23-01-00	0.784
2016-02-23-03-00	0.784
2016-02-23-05-00	0.893
2016-02-23-07-00	0.784
2016-02-23-09-00	0.893
2016-02-23-11-00	0.784
2016-02-23-13-00	0.784
2016-02-23-15-00	0.784
2016-02-23-17-00	0.893
2016-02-23-19-00	0.674
2016-02-23-21-00	0.784
2016-02-23-23-00	0.784
2016-02-24-01-00	0.784
2016-02-24-03-00	0.674
2016-02-24-05-00	0.674
2016-02-24-07-00	0.674
2016-02-24-09-00	0.784
2016-02-24-11-00	0.784
2016-02-24-13-00	0.674
2016-02-24-15-00	0.784
2016-02-24-17-00	0.893
2016-02-24-19-00	0.674
2016-02-24-21-00	0.563
2016-02-24-23-00	0.674
2016-02-25-01-00	0.784
2016-02-25-03-00	0.674
2016-02-25-05-00	0.784
2016-02-25-07-00	0.563
2016-02-25-09-00	0.563
2016-02-25-11-00	0.674
2016-02-25-13-00	0.784
2016-02-25-15-00	0.893
2016-02-25-17-00	0.893
2016-02-25-19-00	0.893
2016-02-25-21-00	0.784
2016-02-25-23-00	0.784
2016-02-26-01-00	0.784
2016-02-26-03-00	0.784
2016-02-26-05-00	0.674
2016-02-26-07-00	0.453
2016-02-26-09-00	0.453
2016-02-26-11-00	0.563
2016-02-26-13-00	0.784
2016-02-26-15-00	0.784
2016-02-26-17-00	0.784
2016-02-26-19-00	0.784
2016-02-26-21-00	0.674
2016-02-26-23-00	0.674
2016-02-27-01-00	0.784
2016-02-27-03-00	0.784
2016-02-27-05-00	0.784
2016-02-27-07-00	0.563
2016-02-27-09-00	0.674
2016-02-27-11-00	0.784
2016-02-27-13-00	0.784
2016-02-27-15-00	0.784
2016-02-27-17-00	0.893
2016-02-27-19-00	0.893
2016-02-27-21-00	1.003
2016-02-27-23-00	0.893
2016-02-28-01-00	0.893
2016-02-28-03-00	0.893
2016-02-28-05-00	0.893
2016-02-28-07-00	0.893
2016-02-28-09-00	0.784
2016-02-28-11-00	0.674
2016-02-28-13-00	0.784
2016-02-28-15-00	0.784
2016-02-28-17-00	0.784
2016-02-28-19-00	0.674
2016-02-28-21-00	0.563
2016-02-28-23-00	0.674
2016-02-29-01-00	0.674
2016-02-29-03-00	0.674
2016-02-29-05-00	0.674
2016-02-29-07-00	0.563
2016-02-29-09-00	0.563
2016-02-29-11-00	0.563
2016-02-29-13-00	0.674
2016-02-29-15-00	0.784
2016-02-29-17-00	0.893
2016-02-29-19-00	0.784
2016-02-29-21-00	0.784
2016-02-29-23-00	0.784
2016-03-01-01-00	0.674
2016-03-01-03-00	0.784
2016-03-01-05-00	0.784
2016-03-01-07-00	0.784
2016-03-01-09-00	0.784
2016-03-01-11-00	0.784
2016-03-01-13-00	0.784
2016-03-01-15-00	0.784
2016-03-01-17-00	0.784
2016-03-01-19-00	0.893
2016-03-01-21-00	0.893
2016-03-01-23-00	0.784
2016-03-02-01-00	0.784
2016-03-02-03-00	0.674
2016-03-02-05-00	0.674
2016-03-02-07-00	0.674
2016-03-02-09-00	0.784
2016-03-02-11-00	0.784
2016-03-02-13-00	0.784
2016-03-02-15-00	0.784
2016-03-02-17-00	0.784
2016-03-02-19-00	0.784
2016-03-02-21-00	0.784
2016-03-02-23-00	0.893
2016-03-03-01-00	0.784
2016-03-03-03-00	0.784
2016-03-03-05-00	0.784
2016-03-03-07-00	0.893
2016-03-03-09-00	0.893
2016-03-03-11-00	0.893
2016-03-03-13-00	0.893
2016-03-03-15-00	0.893
2016-03-03-17-00	1.003
2016-03-03-19-00	0.893
2016-03-03-21-00	0.893
2016-03-03-23-00	0.893
2016-03-04-01-00	0.893
2016-03-04-03-00	0.893
2016-03-04-05-00	0.893
2016-03-04-07-00	0.893
2016-03-04-09-00	0.893
2016-03-04-11-00	0.784
2016-03-04-13-00	0.784
2016-03-04-15-00	0.784
2016-03-04-17-00	0.784
2016-03-04-19-00	0.893
2016-03-04-21-00	0.893
2016-03-04-23-00	0.784
2016-03-05-01-00	0.784
2016-03-05-03-00	0.784
2016-03-05-05-00	0.563
2016-03-05-07-00	0.784
2016-03-05-09-00	0.784
2016-03-05-11-00	0.784
2016-03-05-13-00	0.784
2016-03-05-15-00	0.784
2016-03-05-17-00	0.784
2016-03-05-19-00	0.784
2016-03-05-21-00	0.784
2016-03-05-23-00	0.784
2016-03-06-01-00	0.784
2016-03-06-03-00	0.784
2016-03-06-05-00	0.784
2016-03-06-07-00	0.784
2016-03-06-09-00	0.674
2016-03-06-11-00	0.674
2016-03-06-13-00	0.784
2016-03-06-15-00	0.784
2016-03-06-17-00	0.784
2016-03-06-19-00	0.784
2016-03-06-21-00	0.674
2016-03-06-23-00	0.784
2016-03-07-01-00	0.674
2016-03-07-03-00	0.674
2016-03-07-05-00	0.674
2016-03-07-07-00	0.563
2016-03-07-09-00	0.563
2016-03-07-11-00	0.674
2016-03-07-13-00	0.563
2016-03-07-15-00	0.674
2016-03-07-17-00	0.674
2016-03-07-19-00	0.563
2016-03-07-21-00	0.563
2016-03-07-23-00	0.563
2016-03-08-01-00	0.674
2016-03-08-03-00	0.674
2016-03-08-05-00	0.563
2016-03-08-07-00	0.453
2016-03-08-09-00	0.343
2016-03-08-11-00	0.674
2016-03-08-13-00	0.674
2016-03-08-15-00	0.674
2016-03-08-17-00	0.563
2016-03-08-19-00	0.784
2016-03-08-21-00	0.674
2016-03-08-23-00	0.674
2016-03-09-01-00	0.784
2016-03-09-03-00	0.674
2016-03-09-05-00	0.563
2016-03-09-07-00	0.674
2016-03-09-09-00	0.563
2016-03-09-11-00	0.674
2016-03-09-13-00	0.784
2016-03-09-15-00	0.784
2016-03-09-17-00	0.674
2016-03-09-19-00	0.563
2016-03-09-21-00	0.453
2016-03-09-23-00	0.563
2016-03-10-01-00	0.784
2016-03-10-03-00	0.674
2016-03-10-05-00	0.453
2016-03-10-07-00	0.563
2016-03-10-09-00	0.563
2016-03-10-11-00	0.674
2016-03-10-13-00	0.674
2016-03-10-15-00	0.674
2016-03-10-17-00	0.784
2016-03-10-19-00	0.674
2016-03-10-21-00	0.674
2016-03-10-23-00	0.674
2016-03-11-01-00	0.674
2016-03-11-03-00	0.674
2016-03-11-05-00	0.674
2016-03-11-07-00	0.674
2016-03-11-09-00	0.784
2016-03-11-11-00	0.674
2016-03-11-13-00	0.674
2016-03-11-15-00	0.674
2016-03-11-17-00	0.674
2016-03-11-19-00	0.674
2016-03-11-21-00	0.563
2016-03-11-23-00	0.563
2016-03-12-01-00	0.674
2016-03-12-03-00	0.563
2016-03-12-05-00	0.674
2016-03-12-07-00	0.563
2016-03-12-09-00	0.563
2016-03-12-11-00	0.563
2016-03-12-13-00	0.563
2016-03-12-15-00	0.674
2016-03-12-17-00	0.674
2016-03-12-19-00	0.674
2016-03-12-21-00	0.674
2016-03-12-23-00	0.453
2016-03-13-01-00	0.563
2016-03-13-03-00	0.674
2016-03-13-05-00	0.674
2016-03-13-07-00	0.563
2016-03-13-09-00	0.563
2016-03-13-11-00	0.563
2016-03-13-13-00	0.674
2016-03-13-15-00	0.784
2016-03-13-17-00	0.674
2016-03-13-19-00	0.674
2016-03-13-21-00	0.563
2016-03-13-23-00	0.674
2016-03-14-01-00	0.453
2016-03-14-03-00	0.453
2016-03-14-05-00	0.121
2016-03-14-07-00	0.453
2016-03-14-09-00	0.453
2016-03-14-11-00	0.563
2016-03-14-13-00	0.453
2016-03-14-15-00	0.453
2016-03-14-17-00	0.563
2016-03-14-19-00	0.453
2016-03-14-21-00	0.343
2016-03-14-23-00	0.453
2016-03-15-01-00	0.453
2016-03-15-03-00	0.674
2016-03-15-05-00	0.674
2016-03-15-07-00	0.563
2016-03-15-09-00	0.232
2016-03-15-11-00	0.453
2016-03-15-13-00	0.563
2016-03-15-15-00	0.453
2016-03-15-17-00	0.232
2016-03-15-19-00	0.232
2016-03-15-21-00	0.453
2016-03-15-23-00	0.563
2016-03-16-01-00	0.343
2016-03-16-03-00	0.343
2016-03-16-05-00	0.343
2016-03-16-07-00	0.343
2016-03-16-09-00	0.343
2016-03-16-11-00	0.343
2016-03-16-13-00	0.453
2016-03-16-15-00	0.453
2016-03-16-17-00	0.563
2016-03-16-19-00	0.563
2016-03-16-21-00	0.453
2016-03-16-23-00	0.453
2016-03-17-01-00	0.453
2016-03-17-03-00	0.453
2016-03-17-05-00	0.563
2016-03-17-07-00	0.563
2016-03-17-09-00	0.563
2016-03-17-11-00	0.563
2016-03-17-13-00	0.563
2016-03-17-15-00	0.563
2016-03-17-17-00	0.563
2016-03-17-19-00	0.563
2016-03-17-21-00	0.563
2016-03-17-23-00	0.563
2016-03-18-01-00	0.563
2016-03-18-03-00	0.453
2016-03-18-05-00	0.453
2016-03-18-07-00	0.453
2016-03-18-09-00	0.453
2016-03-18-11-00	0.453
2016-03-18-13-00	0.453
2016-03-18-15-00	0.453
2016-03-18-17-00	0.453
2016-03-18-19-00	0.453
2016-03-18-21-00	0.453
2016-03-18-23-00	0.563
2016-03-19-01-00	0.453
2016-03-19-03-00	0.453
2016-03-19-05-00	0.343
2016-03-19-07-00	0.343
2016-03-19-09-00	0.343
2016-03-19-11-00	0.343
2016-03-19-13-00	0.453
2016-03-19-15-00	0.453
2016-03-19-17-00	0.453
2016-03-19-19-00	0.343
2016-03-19-21-00	0.453
2016-03-19-23-00	0.453
2016-03-20-01-00	0.343
2016-03-20-03-00	0.453
2016-03-20-05-00	0.343
2016-03-20-07-00	0.343
2016-03-20-09-00	0.453
2016-03-20-11-00	0.232
2016-03-20-13-00	0.343
2016-03-20-15-00	0.232
2016-03-20-17-00	0.121
2016-03-20-19-00	0.121
2016-03-20-21-00	0.232
2016-03-20-23-00	0.343
2016-03-21-01-00	0.121
2016-03-21-03-00	0.01
2016-03-21-05-00	0.232
2016-03-21-07-00	0.232
2016-03-21-09-00	0.232
2016-03-21-11-00	0.232
2016-03-21-13-00	0.232
2016-03-21-15-00	0.232
2016-03-21-17-00	0.232
2016-03-21-19-00	0.232
2016-03-21-21-00	0.232
2016-03-21-23-00	0.232
2016-03-22-01-00	0.343
2016-03-22-03-00	0.121
2016-03-22-05-00	0.121
2016-03-22-07-00	0.121
2016-03-22-09-00	0.121
2016-03-22-11-00	0.232
2016-03-22-13-00	0.232
2016-03-22-15-00	0.232
2016-03-22-17-00	0.343
2016-03-22-19-00	0.343
2016-03-22-21-00	0.343
2016-03-22-23-00	0.343
2016-03-23-01-00	0.343
2016-03-23-03-00	0.343
2016-03-23-05-00	0.343
2016-03-23-07-00	0.343
2016-03-23-09-00	0.343
2016-03-23-11-00	0.453
2016-03-23-13-00	0.563
2016-03-23-15-00	0.343
2016-03-23-17-00	0.232
2016-03-23-19-00	0.121
2016-03-23-21-00	0.121
2016-03-23-23-00	0.232
2016-03-24-01-00	0.232
2016-03-24-03-00	0.121
2016-03-24-05-00	0.121
2016-03-24-07-00	0.121
2016-03-24-09-00	0.121
2016-03-24-11-00	0.343
2016-03-24-13-00	0.232
2016-03-24-15-00	0.343
2016-03-24-17-00	0.121
2016-03-24-19-00	0.121
2016-03-24-21-00	0.121
2016-03-24-23-00	0.232
2016-03-25-01-00	0.232
2016-03-25-03-00	0.232
2016-03-25-05-00	0.121
2016-03-25-07-00	0.121
2016-03-25-09-00	0.121
2016-03-25-11-00	0.121
2016-03-25-13-00	0.121
2016-03-25-15-00	0.121
2016-03-25-17-00	0.232
2016-03-25-19-00	0.232
2016-03-25-21-00	0.232
2016-03-25-23-00	0.121
2016-03-26-01-00	0.121
2016-03-26-03-00	0.121
2016-03-26-05-00	0.232
2016-03-26-07-00	0.232
2016-03-26-09-00	0.232
2016-03-26-11-00	0.232
2016-03-26-13-00	0.232
2016-03-26-15-00	0.232
2016-03-26-17-00	0.232
2016-03-26-19-00	0.232
2016-03-26-21-00	0.232
2016-03-26-23-00	0.232
2016-03-27-01-00	0.232
2016-03-27-03-00	0.232
2016-03-27-05-00	0.232
2016-03-27-07-00	0.232
2016-03-27-09-00	0.232
2016-03-27-11-00	0.232
2016-03-27-13-00	0.232
2016-03-27-15-00	0.232
2016-03-27-17-00	0.232
2016-03-27-19-00	0.232
2016-03-27-21-00	0.232
2016-03-27-23-00	0.232
2016-03-28-01-00	0.232
2016-03-28-03-00	0.232
2016-03-28-05-00	0.232
2016-03-28-07-00	0.232
2016-03-28-09-00	0.232
2016-03-28-11-00	0.232
2016-03-28-13-00	0.232
2016-03-28-15-00	0.232
2016-03-28-17-00	0.232
2016-03-28-19-00	0.232
2016-03-28-21-00	0.232
2016-03-28-23-00	0.232
2016-03-29-01-00	0.232
2016-03-29-03-00	0.232
2016-03-29-05-00	0.232
2016-03-29-07-00	0.232
2016-03-29-09-00	0.232
2016-03-29-11-00	0.232
2016-03-29-13-00	0.232
2016-03-29-15-00	0.343
2016-03-29-17-00	0.232
2016-03-29-19-00	0.232
2016-03-29-21-00	0.232
2016-03-29-23-00	0.232
2016-03-30-01-00	0.232
2016-03-30-03-00	0.232
2016-03-30-05-00	0.232
2016-03-30-07-00	0.232
2016-03-30-09-00	0.232
2016-03-30-11-00	0.232
2016-03-30-13-00	0.343
2016-03-30-15-00	0.343
2016-03-30-17-00	0.343
2016-03-30-19-00	0.232
2016-03-30-21-00	0.232
2016-03-30-23-00	0.232
2016-03-31-01-00	0.232
2016-03-31-03-00	0.232
2016-03-31-05-00	0.232
2016-03-31-07-00	0.121
2016-03-31-09-00	0.232
2016-03-31-11-00	0.232
2016-03-31-13-00	0.232
2016-03-31-15-00	0.232
2016-03-31-17-00	0.343
2016-03-31-19-00	0.232
2016-03-31-21-00	0.232
2016-03-31-23-00	0.121
2016-04-01-01-00	0.232
2016-04-01-03-00	0.232
2016-04-01-05-00	0.232
2016-04-01-07-00	0.232
2016-04-01-09-00	0.232
2016-04-01-11-00	0.232
2016-04-01-13-00	0.232
2016-04-01-15-00	0.232
2016-04-01-17-00	0.232
2016-04-01-19-00	0.232
2016-04-01-21-00	0.232
2016-04-01-23-00	0.01
2016-04-02-01-00	0.121
2016-04-02-03-00	0.01
2016-04-02-05-00	0.121
2016-04-02-07-00	0.121
2016-04-02-09-00	0.121
2016-04-02-11-00	0.121
2016-04-02-13-00	0.01
2016-04-02-15-00	-0.102
2016-04-02-17-00	0.01
2016-04-02-19-00	0.01
2016-04-02-21-00	0.232
2016-04-02-23-00	0.121
2016-04-03-01-00	0.121
2016-04-03-03-00	0.121
2016-04-03-05-00	0.121
2016-04-03-07-00	0.121
2016-04-03-09-00	0.121
2016-04-03-11-00	0.121
2016-04-03-13-00	0.121
2016-04-03-15-00	0.121
2016-04-03-17-00	0.121
2016-04-03-19-00	0.01
2016-04-03-21-00	0.232
2016-04-03-23-00	0.01
2016-04-04-01-00	0.232
2016-04-04-03-00	0.121
2016-04-04-05-00	0.01
2016-04-04-07-00	-0.102
2016-04-04-09-00	0.01
2016-04-04-11-00	-0.102
2016-04-04-13-00	0.01
2016-04-04-15-00	-0.102
2016-04-04-17-00	-0.102
2016-04-04-19-00	-0.102
2016-04-04-21-00	0.121
2016-04-04-23-00	0.121
2016-04-05-01-00	0.01
2016-04-05-03-00	0.01
2016-04-05-05-00	0.01
2016-04-05-07-00	0.121
2016-04-05-09-00	0.121
2016-04-05-11-00	0.121
2016-04-05-13-00	0.121
2016-04-05-15-00	0.121
2016-04-05-17-00	0.121
2016-04-05-19-00	0.121
2016-04-05-21-00	0.121
2016-04-05-23-00	0.232
2016-04-06-01-00	0.232
2016-04-06-03-00	0.121
2016-04-06-05-00	0.232
2016-04-06-07-00	0.121
2016-04-06-09-00	0.121
2016-04-06-11-00	0.121
2016-04-06-13-00	0.232
2016-04-06-15-00	0.232
2016-04-06-17-00	0.232
2016-04-06-19-00	0.232
2016-04-06-21-00	0.232
2016-04-06-23-00	0.232
2016-04-07-01-00	0.232
2016-04-07-03-00	0.232
2016-04-07-05-00	0.232
2016-04-07-07-00	0.232
2016-04-07-09-00	0.121
2016-04-07-11-00	0.232
2016-04-07-13-00	0.232
2016-04-07-15-00	0.232
2016-04-07-17-00	0.232
2016-04-07-19-00	0.121
2016-04-07-21-00	0.232
2016-04-07-23-00	0.121
2016-04-08-01-00	0.232
2016-04-08-03-00	0.232
2016-04-08-05-00	0.121
2016-04-08-07-00	0.01
2016-04-08-09-00	0.121
2016-04-08-11-00	0.121
2016-04-08-13-00	0.232
2016-04-08-15-00	0.121
2016-04-08-17-00	0.121
2016-04-08-19-00	0.121
2016-04-08-21-00	0.121
2016-04-08-23-00	0.121
2016-04-09-01-00	0.121
2016-04-09-03-00	0.121
2016-04-09-05-00	0.121
2016-04-09-07-00	0.121
2016-04-09-09-00	0.121
2016-04-09-11-00	0.121
2016-04-09-13-00	0.121
2016-04-09-15-00	0.121
2016-04-09-17-00	0.232
2016-04-09-19-00	0.232
2016-04-09-21-00	0.121
2016-04-09-23-00	0.121
2016-04-10-01-00	0.121
2016-04-10-03-00	0.121
2016-04-10-05-00	0.01
2016-04-10-07-00	0.01
2016-04-10-09-00	-0.213
2016-04-10-11-00	-0.102
2016-04-10-13-00	-0.102
2016-04-10-15-00	0.01
2016-04-10-17-00	0.01
2016-04-10-19-00	0.232
2016-04-10-21-00	0.01
2016-04-10-23-00	0.121
2016-04-11-01-00	0.01
2016-04-11-03-00	0.121
2016-04-11-05-00	0.121
2016-04-11-07-00	0.01
2016-04-11-09-00	0.121
2016-04-11-11-00	0.121
2016-04-11-13-00	0.121
2016-04-11-15-00	0.121
2016-04-11-17-00	0.232
2016-04-11-19-00	0.121
2016-04-11-21-00	0.121
2016-04-11-23-00	0.121
2016-04-12-01-00	0.121
2016-04-12-03-00	0.121
2016-04-12-05-00	-0.325
2016-04-12-07-00	-0.437
2016-04-12-09-00	-0.102
2016-04-12-11-00	0.01
2016-04-12-13-00	-0.102
2016-04-12-15-00	-0.102
2016-04-12-17-00	-0.102
2016-04-12-19-00	-0.102
2016-04-12-21-00	0.01
2016-04-12-23-00	0.01
2016-04-13-01-00	0.01
2016-04-13-03-00	0.121
2016-04-13-05-00	0.121
2016-04-13-07-00	-0.325
2016-04-13-09-00	-0.325
2016-04-13-11-00	-0.437
2016-04-13-13-00	-0.213
2016-04-13-15-00	-0.102
2016-04-13-17-00	-0.213
2016-04-13-19-00	-0.213
2016-04-13-21-00	0.01
2016-04-13-23-00	0.01
2016-04-14-01-00	0.01
2016-04-14-03-00	-0.102
2016-04-14-05-00	-0.213
2016-04-14-07-00	-0.325
2016-04-14-09-00	-0.325
2016-04-14-11-00	-0.213
2016-04-14-13-00	-0.102
2016-04-14-15-00	0.01
2016-04-14-17-00	-0.102
2016-04-14-19-00	0.01
2016-04-14-21-00	0.01
2016-04-14-23-00	-0.213
2016-04-15-01-00	-0.102
2016-04-15-03-00	0.01
2016-04-15-05-00	0.121
2016-04-15-07-00	0.01
2016-04-15-09-00	0.01
2016-04-15-11-00	-0.102
2016-04-15-13-00	0.01
2016-04-15-15-00	0.01
2016-04-15-17-00	0.01
2016-04-15-19-00	0.01
2016-04-15-21-00	-0.102
2016-04-15-23-00	-0.213
2016-04-16-01-00	-0.102
2016-04-16-03-00	0.01
2016-04-16-05-00	0.01
2016-04-16-07-00	0.121
2016-04-16-09-00	0.121
2016-04-16-11-00	0.121
2016-04-16-13-00	0.121
2016-04-16-15-00	0.01
2016-04-16-17-00	0.01
2016-04-16-19-00	0.232
2016-04-16-21-00	0.01
2016-04-16-23-00	-0.102
2016-04-17-01-00	-0.213
2016-04-17-03-00	-0.213
2016-04-17-05-00	-0.325
2016-04-17-07-00	-0.437
2016-04-17-09-00	-0.437
2016-04-17-11-00	-0.325
2016-04-17-13-00	-0.325
2016-04-17-15-00	-0.437
2016-04-17-17-00	-0.437
2016-04-17-19-00	-0.437
2016-04-17-21-00	-0.325
2016-04-17-23-00	-0.325
2016-04-18-01-00	-0.325
2016-04-18-03-00	-0.437
2016-04-18-05-00	-0.325
2016-04-18-07-00	-0.437
2016-04-18-09-00	-0.437
2016-04-18-11-00	-0.213
2016-04-18-13-00	-0.102
2016-04-18-15-00	-0.213
2016-04-18-17-00	-0.213
2016-04-18-19-00	-0.437
2016-04-18-21-00	-0.437
2016-04-18-23-00	-0.213
2016-04-19-01-00	-0.325
2016-04-19-03-00	-0.213
2016-04-19-05-00	-0.437
2016-04-19-07-00	-0.662
2016-04-19-09-00	-0.549
2016-04-19-11-00	-0.325
2016-04-19-13-00	-0.437
2016-04-19-15-00	-0.325
2016-04-19-17-00	-0.437
2016-04-19-19-00	-0.437
2016-04-19-21-00	-0.437
2016-04-19-23-00	-0.437
2016-04-20-01-00	-0.437
2016-04-20-03-00	-0.102
2016-04-20-05-00	-0.213
2016-04-20-07-00	-0.325
2016-04-20-09-00	-0.213
2016-04-20-11-00	-0.325
2016-04-20-13-00	-0.325
2016-04-20-15-00	-0.549
2016-04-20-17-00	-0.437
2016-04-20-19-00	-0.549
2016-04-20-21-00	-0.662
2016-04-20-23-00	-0.549
2016-04-21-01-00	-0.662
2016-04-21-03-00	-0.774
2016-04-21-05-00	-0.662
2016-04-21-07-00	-0.549
2016-04-21-09-00	-0.662
2016-04-21-11-00	-0.549
2016-04-21-13-00	-0.325
2016-04-21-15-00	-0.325
2016-04-21-17-00	-0.325
2016-04-21-19-00	-0.549
2016-04-21-21-00	-0.662
2016-04-21-23-00	-0.662
2016-04-22-01-00	-0.213
2016-04-22-03-00	-0.102
2016-04-22-05-00	-0.325
2016-04-22-07-00	-0.549
2016-04-22-09-00	-0.662
2016-04-22-11-00	-0.549
2016-04-22-13-00	-0.213
2016-04-22-15-00	-0.325
2016-04-22-17-00	-0.437
2016-04-22-19-00	-0.549
2016-04-22-21-00	-0.662
2016-04-22-23-00	-0.662
2016-04-23-01-00	-0.437
2016-04-23-03-00	-0.325
2016-04-23-05-00	-0.437
2016-04-23-07-00	-0.774
2016-04-23-09-00	-0.887
2016-04-23-11-00	-0.774
2016-04-23-13-00	-0.213
2016-04-23-15-00	-0.549
2016-04-23-17-00	-0.437
2016-04-23-19-00	-0.437
2016-04-23-21-00	-0.662
2016-04-23-23-00	-0.662
2016-04-24-01-00	-0.662
2016-04-24-03-00	-0.213
2016-04-24-05-00	-0.102
2016-04-24-07-00	-0.662
2016-04-24-09-00	-0.549
2016-04-24-11-00	-0.662
2016-04-24-13-00	-0.549
2016-04-24-15-00	-0.549
2016-04-24-17-00	-0.662
2016-04-24-19-00	-0.549
2016-04-24-21-00	-0.662
2016-04-24-23-00	-0.774
2016-04-25-01-00	-0.662
2016-04-25-03-00	-0.325
2016-04-25-05-00	-0.213
2016-04-25-07-00	-0.549
2016-04-25-09-00	-0.774
2016-04-25-11-00	-0.774
2016-04-25-13-00	-0.774
2016-04-25-15-00	-0.662
2016-04-25-17-00	-0.437
2016-04-25-19-00	-0.549
2016-04-25-21-00	-0.437
2016-04-25-23-00	-0.549
2016-04-26-01-00	-0.662
2016-04-26-03-00	-0.549
2016-04-26-05-00	-0.102
2016-04-26-07-00	-0.662
2016-04-26-09-00	-0.662
2016-04-26-11-00	-0.774
2016-04-26-13-00	-0.774
2016-04-26-15-00	-0.662
2016-04-26-17-00	-0.549
2016-04-26-19-00	-0.549
2016-04-26-21-00	-0.549
2016-04-26-23-00	-0.662
2016-04-27-01-00	-0.549
2016-04-27-03-00	-0.549
2016-04-27-05-00	-0.437
2016-04-27-07-00	-0.774
2016-04-27-09-00	-0.774
2016-04-27-11-00	-0.774
2016-04-27-13-00	-0.774
2016-04-27-15-00	-0.774
2016-04-27-17-00	-0.774
2016-04-27-19-00	-0.662
2016-04-27-21-00	-0.662
2016-04-27-23-00	-0.662
2016-04-28-01-00	-0.549
2016-04-28-03-00	-0.437
2016-04-28-05-00	-0.549
2016-04-28-07-00	-0.662
2016-04-28-09-00	-0.662
2016-04-28-11-00	-0.662
2016-04-28-13-00	-0.774
2016-04-28-15-00	-0.662
2016-04-28-17-00	-0.549
2016-04-28-19-00	-0.437
2016-04-28-21-00	-0.437
2016-04-28-23-00	-0.437
2016-04-29-01-00	-0.437
2016-04-29-03-00	-0.437
2016-04-29-05-00	-0.437
2016-04-29-07-00	-0.662
2016-04-29-09-00	-0.662
2016-04-29-11-00	-0.549
2016-04-29-13-00	-0.662
2016-04-29-15-00	-0.662
2016-04-29-17-00	-0.549
2016-04-29-19-00	-0.662
2016-04-29-21-00	-0.774
2016-04-29-23-00	-0.662
2016-04-30-01-00	-0.549
2016-04-30-03-00	-0.549
2016-04-30-05-00	-0.549
2016-04-30-07-00	-0.549
2016-04-30-09-00	-0.549
2016-04-30-11-00	-0.549
2016-04-30-13-00	-0.549
2016-04-30-15-00	-0.549
2016-04-30-17-00	-0.549
2016-04-30-19-00	-0.549
2016-04-30-21-00	-0.549
2016-04-30-23-00	-0.662
2016-05-01-01-00	-0.662
2016-05-01-03-00	-0.549
2016-05-01-05-00	-0.549
2016-05-01-07-00	-0.549
2016-05-01-09-00	-0.549
2016-05-01-11-00	-0.549
2016-05-01-13-00	-0.549
2016-05-01-15-00	-0.662
2016-05-01-17-00	-0.774
2016-05-01-19-00	-0.662
2016-05-01-21-00	-0.662
2016-05-01-23-00	-0.662
2016-05-02-01-00	-0.774
2016-05-02-03-00	-0.774
2016-05-02-05-00	-0.774
2016-05-02-07-00	-0.887
2016-05-02-09-00	-0.887
2016-05-02-11-00	-0.887
2016-05-02-13-00	-0.774
2016-05-02-15-00	-0.662
2016-05-02-17-00	-0.774
2016-05-02-19-00	-0.774
2016-05-02-21-00	-0.774
2016-05-02-23-00	-0.774
2016-05-03-01-00	-0.887
2016-05-03-03-00	-0.774
2016-05-03-05-00	-0.774
2016-05-03-07-00	-0.662
2016-05-03-09-00	-0.774
2016-05-03-11-00	-0.662
2016-05-03-13-00	-0.662
2016-05-03-15-00	-0.774
2016-05-03-17-00	-0.887
2016-05-03-19-00	-0.662
2016-05-03-21-00	-0.549
2016-05-03-23-00	-0.662
2016-05-04-01-00	-0.774
2016-05-04-03-00	-0.887
2016-05-04-05-00	-0.887
2016-05-04-07-00	-0.887
2016-05-04-09-00	-0.774
2016-05-04-11-00	-0.774
2016-05-04-13-00	-0.774
2016-05-04-15-00	-0.887
2016-05-04-17-00	-1.001
2016-05-04-19-00	-0.887
2016-05-04-21-00	-1.001
2016-05-04-23-00	-0.887
2016-05-05-01-00	-0.887
2016-05-05-03-00	-0.887
2016-05-05-05-00	-0.662
2016-05-05-07-00	-0.887
2016-05-05-09-00	-0.887
2016-05-05-11-00	-0.774
2016-05-05-13-00	-0.774
2016-05-05-15-00	-0.662
2016-05-05-17-00	-0.887
2016-05-05-19-00	-0.662
2016-05-05-21-00	-0.774
2016-05-05-23-00	-0.887
2016-05-06-01-00	-0.662
2016-05-06-03-00	-0.774
2016-05-06-05-00	-0.774
2016-05-06-07-00	-0.887
2016-05-06-09-00	-0.887
2016-05-06-11-00	-0.887
2016-05-06-13-00	-0.662
2016-05-06-15-00	-0.887
2016-05-06-17-00	-0.887
2016-05-06-19-00	-0.887
2016-05-06-21-00	-0.774
2016-05-06-23-00	-0.887
2016-05-07-01-00	-0.887
2016-05-07-03-00	-0.774
2016-05-07-05-00	-0.774
2016-05-07-07-00	-0.774
2016-05-07-09-00	-0.774
2016-05-07-11-00	-0.662
2016-05-07-13-00	-0.662
2016-05-07-15-00	-0.774
2016-05-07-17-00	-0.774
2016-05-07-19-00	-0.662
2016-05-07-21-00	-0.437
2016-05-07-23-00	-0.662
2016-05-08-01-00	-0.549
2016-05-08-03-00	-0.549
2016-05-08-05-00	-0.437
2016-05-08-07-00	-0.774
2016-05-08-09-00	-0.774
2016-05-08-11-00	-0.549
2016-05-08-13-00	-0.662
2016-05-08-15-00	-0.662
2016-05-08-17-00	-0.774
2016-05-08-19-00	-0.549
2016-05-08-21-00	-0.549
2016-05-08-23-00	-0.774
2016-05-09-01-00	-0.662
2016-05-09-03-00	-0.774
2016-05-09-05-00	-0.549
2016-05-09-07-00	-0.662
2016-05-09-09-00	-0.549
2016-05-09-11-00	-0.662
2016-05-09-13-00	-0.662
2016-05-09-15-00	-0.549
2016-05-09-17-00	-0.662
2016-05-09-19-00	-0.662
2016-05-09-21-00	-0.662
2016-05-09-23-00	-0.549
2016-05-10-01-00	-0.549
2016-05-10-03-00	-0.549
2016-05-10-05-00	-0.549
2016-05-10-07-00	-0.662
2016-05-10-09-00	-0.662
2016-05-10-11-00	-0.662
2016-05-10-13-00	-0.549
2016-05-10-15-00	-0.549
2016-05-10-17-00	-0.662
2016-05-10-19-00	-0.662
2016-05-10-21-00	-0.662
2016-05-10-23-00	-0.662
2016-05-11-01-00	-0.662
2016-05-11-03-00	-0.662
2016-05-11-05-00	-0.662
2016-05-11-07-00	-0.774
2016-05-11-09-00	-0.662
2016-05-11-11-00	-0.662
2016-05-11-13-00	-0.662
2016-05-11-15-00	-0.662
2016-05-11-17-00	-0.549
2016-05-11-19-00	-0.549
2016-05-11-21-00	-0.662
2016-05-11-23-00	-0.549
2016-05-12-01-00	-0.662
2016-05-12-03-00	-0.662
2016-05-12-05-00	-0.549
2016-05-12-07-00	-0.662
2016-05-12-09-00	-0.662
2016-05-12-11-00	-0.662
2016-05-12-13-00	-0.662
2016-05-12-15-00	-0.662
2016-05-12-17-00	-0.549
2016-05-12-19-00	-0.549
2016-05-12-21-00	-0.662
2016-05-12-23-00	-0.662
2016-05-13-01-00	-0.662
2016-05-13-03-00	-0.662
2016-05-13-05-00	-0.662
2016-05-13-07-00	-0.662
2016-05-13-09-00	-0.662
2016-05-13-11-00	-0.662
2016-05-13-13-00	-0.662
2016-05-13-15-00	-0.662
2016-05-13-17-00	-0.662
2016-05-13-19-00	-0.662
2016-05-13-21-00	-0.662
2016-05-13-23-00	-0.662
2016-05-14-01-00	-0.549
2016-05-14-03-00	-0.774
2016-05-14-05-00	-0.774
2016-05-14-07-00	-0.774
2016-05-14-09-00	-0.662
2016-05-14-11-00	-0.774
2016-05-14-13-00	-0.887
2016-05-14-15-00	-0.887
2016-05-14-17-00	-0.774
2016-05-14-19-00	-0.774
2016-05-14-21-00	-0.662
2016-05-14-23-00	-0.887
2016-05-15-01-00	-0.662
2016-05-15-03-00	-0.774
2016-05-15-05-00	-0.774
2016-05-15-07-00	-0.774
2016-05-15-09-00	-0.774
2016-05-15-11-00	-0.549
2016-05-15-13-00	-0.662
2016-05-15-15-00	-0.662
2016-05-15-17-00	-0.662
2016-05-15-19-00	-0.774
2016-05-15-21-00	-0.662
2016-05-15-23-00	-0.662
2016-05-16-01-00	-0.662
2016-05-16-03-00	-0.662
2016-05-16-05-00	-0.774
2016-05-16-07-00	-0.662
2016-05-16-09-00	-0.662
2016-05-16-11-00	-0.774
2016-05-16-13-00	-0.774
2016-05-16-15-00	-0.662
2016-05-16-17-00	-0.662
2016-05-16-19-00	-0.662
2016-05-16-21-00	-0.662
2016-05-16-23-00	-0.662
2016-05-17-01-00	-0.774
2016-05-17-03-00	-0.774
2016-05-17-05-00	-0.662
2016-05-17-07-00	-0.662
2016-05-17-09-00	-0.662
2016-05-17-11-00	-0.662
2016-05-17-13-00	-0.662
2016-05-17-15-00	-0.662
2016-05-17-17-00	-0.662
2016-05-17-19-00	-0.662
2016-05-17-21-00	-0.662
2016-05-17-23-00	-0.662
2016-05-18-01-00	-0.662
2016-05-18-03-00	-0.662
2016-05-18-05-00	-0.662
2016-05-18-07-00	-0.662
2016-05-18-09-00	-0.662
2016-05-18-11-00	-0.662
2016-05-18-13-00	-0.662
2016-05-18-15-00	-0.774
2016-05-18-17-00	-0.774
2016-05-18-19-00	-0.774
2016-05-18-21-00	-0.662
2016-05-18-23-00	-0.662
2016-05-19-01-00	-0.662
2016-05-19-03-00	-0.662
2016-05-19-05-00	-0.662
2016-05-19-07-00	-0.662
2016-05-19-09-00	-0.662
2016-05-19-11-00	-0.662
2016-05-19-13-00	-0.662
2016-05-19-15-00	-0.662
2016-05-19-17-00	-0.662
2016-05-19-19-00	-0.774
2016-05-19-21-00	-0.662
2016-05-19-23-00	-0.662
2016-05-20-01-00	-0.549
2016-05-20-03-00	-0.662
2016-05-20-05-00	-0.774
2016-05-20-07-00	-0.774
2016-05-20-09-00	-0.774
2016-05-20-11-00	-0.662
2016-05-20-13-00	-0.662
2016-05-20-15-00	-0.662
2016-05-20-17-00	-0.774
2016-05-20-19-00	-0.774
2016-05-20-21-00	-0.662
2016-05-20-23-00	-0.662
2016-05-21-01-00	-0.662
2016-05-21-03-00	-0.662
2016-05-21-05-00	-0.662
2016-05-21-07-00	-0.662
2016-05-21-09-00	-0.662
2016-05-21-11-00	-0.662
2016-05-21-13-00	-0.662
2016-05-21-15-00	-0.662
2016-05-21-17-00	-0.662
2016-05-21-19-00	-0.662
2016-05-21-21-00	-0.662
2016-05-21-23-00	-0.662
2016-05-22-01-00	-0.662
2016-05-22-03-00	-0.662
2016-05-22-05-00	-0.662
2016-05-22-07-00	-0.887
2016-05-22-09-00	-0.887
2016-05-22-11-00	-0.887
2016-05-22-13-00	-0.549
2016-05-22-15-00	-0.549
2016-05-22-17-00	-0.774
2016-05-22-19-00	-0.774
2016-05-22-21-00	-0.887
2016-05-22-23-00	-0.887
2016-05-23-01-00	-0.774
2016-05-23-03-00	-0.549
2016-05-23-05-00	-1.001
2016-05-23-07-00	-0.887
2016-05-23-09-00	-0.774
2016-05-23-11-00	-0.774
2016-05-23-13-00	-0.774
2016-05-23-15-00	-0.887
2016-05-23-17-00	-0.662
2016-05-23-19-00	-0.887
2016-05-23-21-00	-0.887
2016-05-23-23-00	-0.887
2016-05-24-01-00	-0.774
2016-05-24-03-00	-0.774
2016-05-24-05-00	-1.114
2016-05-24-07-00	-1.114
2016-05-24-09-00	-1.114
2016-05-24-11-00	-1.114
2016-05-24-13-00	-0.774
2016-05-24-15-00	-1.001
2016-05-24-17-00	-1.001
2016-05-24-19-00	-0.774
2016-05-24-21-00	-1.001
2016-05-24-23-00	-1.114
2016-05-25-01-00	-1.114
2016-05-25-03-00	-1.114
2016-05-25-05-00	-1.114
2016-05-25-07-00	-1.001
2016-05-25-09-00	-1.001
2016-05-25-11-00	-1.001
2016-05-25-13-00	-1.001
2016-05-25-15-00	-0.774
2016-05-25-17-00	-0.774
2016-05-25-19-00	-0.887
2016-05-25-21-00	-0.774
2016-05-25-23-00	-1.114
2016-05-26-01-00	-1.114
2016-05-26-03-00	-1.001
2016-05-26-05-00	-1.114
2016-05-26-07-00	-1.114
2016-05-26-09-00	-1.114
2016-05-26-11-00	-1.114
2016-05-26-13-00	-1.001
2016-05-26-15-00	-0.887
2016-05-26-17-00	-0.662
2016-05-26-19-00	-0.774
2016-05-26-21-00	-0.887
2016-05-26-23-00	-1.001
2016-05-27-01-00	-1.114
2016-05-27-03-00	-0.887
2016-05-27-05-00	-1.001
2016-05-27-07-00	-1.001
2016-05-27-09-00	-1.001
2016-05-27-11-00	-1.114
2016-05-27-13-00	-1.114
2016-05-27-15-00	-1.001
2016-05-27-17-00	-0.887
2016-05-27-19-00	-0.887
2016-05-27-21-00	-0.774
2016-05-27-23-00	-0.887
2016-05-28-01-00	-1.114
2016-05-28-03-00	-0.774
2016-05-28-05-00	-0.774
2016-05-28-07-00	-0.887
2016-05-28-09-00	-1.114
2016-05-28-11-00	-1.114
2016-05-28-13-00	-0.887
2016-05-28-15-00	-1.001
2016-05-28-17-00	-1.114
2016-05-28-19-00	-0.887
2016-05-28-21-00	-1.114
2016-05-28-23-00	-1.001
2016-05-29-01-00	-1.114
2016-05-29-03-00	-1.114
2016-05-29-05-00	-1.001
2016-05-29-07-00	-0.887
2016-05-29-09-00	-0.887
2016-05-29-11-00	-0.774
2016-05-29-13-00	-1.001
2016-05-29-15-00	-1.001
2016-05-29-17-00	-1.001
2016-05-29-19-00	-0.887
2016-05-29-21-00	-0.887
2016-05-29-23-00	-0.774
2016-05-30-01-00	-0.887
2016-05-30-03-00	-1.001
2016-05-30-05-00	-1.001
2016-05-30-07-00	-0.887
2016-05-30-09-00	-0.774
2016-05-30-11-00	-0.774
2016-05-30-13-00	-0.774
2016-05-30-15-00	-0.887
2016-05-30-17-00	-0.887
2016-05-30-19-00	-0.887
2016-05-30-21-00	-0.887
2016-05-30-23-00	-0.774
2016-05-31-01-00	-0.662
2016-05-31-03-00	-0.887
2016-05-31-05-00	-0.887
2016-05-31-07-00	-0.887
2016-05-31-09-00	-0.774
2016-05-31-11-00	-0.887
2016-05-31-13-00	-1.001
2016-05-31-15-00	-1.001
2016-05-31-17-00	-0.887
2016-05-31-19-00	-0.887
2016-05-31-21-00	-0.662
2016-05-31-23-00	-0.662
2016-06-01-01-00	-0.662
2016-06-01-03-00	-1.228
2016-06-01-05-00	-1.228
2016-06-01-07-00	-1.001
2016-06-01-09-00	-1.001
2016-06-01-11-00	-0.774
2016-06-01-13-00	-0.662
2016-06-01-15-00	-1.114
2016-06-01-17-00	-1.228
2016-06-01-19-00	-1.114
2016-06-01-21-00	-1.114
2016-06-01-23-00	-1.001
2016-06-02-01-00	-1.114
2016-06-02-03-00	-1.228
2016-06-02-05-00	-1.114
2016-06-02-07-00	-1.114
2016-06-02-09-00	-1.114
2016-06-02-11-00	-1.114
2016-06-02-13-00	-1.114
2016-06-02-15-00	-0.774
2016-06-02-17-00	-0.774
2016-06-02-19-00	-1.114
2016-06-02-21-00	-1.114
2016-06-02-23-00	-1.001
2016-06-03-01-00	-0.887
2016-06-03-03-00	-1.001
2016-06-03-05-00	-1.114
2016-06-03-07-00	-1.114
2016-06-03-09-00	-1.228
2016-06-03-11-00	-0.887
2016-06-03-13-00	-1.001
2016-06-03-15-00	-0.887
2016-06-03-17-00	-1.001
2016-06-03-19-00	-0.887
2016-06-03-21-00	-1.114
2016-06-03-23-00	-1.114
2016-06-04-01-00	-0.774
2016-06-04-03-00	-1.228
2016-06-04-05-00	-1.114
2016-06-04-07-00	-1.114
2016-06-04-09-00	-1.114
2016-06-04-11-00	-1.001
2016-06-04-13-00	-0.774
2016-06-04-15-00	-0.887
2016-06-04-17-00	-0.887
2016-06-04-19-00	-0.887
2016-06-04-21-00	-1.001
2016-06-04-23-00	-0.887
2016-06-05-01-00	-0.887
2016-06-05-03-00	-0.887
2016-06-05-05-00	-1.001
2016-06-05-07-00	-1.114
2016-06-05-09-00	-1.001
2016-06-05-11-00	-1.001
2016-06-05-13-00	-1.001
2016-06-05-15-00	-1.001
2016-06-05-17-00	-1.001
2016-06-05-19-00	-1.001
2016-06-05-21-00	-1.001
2016-06-05-23-00	-0.887
2016-06-06-01-00	-1.001
2016-06-06-03-00	-1.001
2016-06-06-05-00	-0.887
2016-06-06-07-00	-1.001
2016-06-06-09-00	-1.001
2016-06-06-11-00	-0.774
2016-06-06-13-00	-0.887
2016-06-06-15-00	-1.001
2016-06-06-17-00	-0.774
2016-06-06-19-00	-1.001
2016-06-06-21-00	-1.001
2016-06-06-23-00	-1.001
2016-06-07-01-00	-0.774
2016-06-07-03-00	-0.774
2016-06-07-05-00	-1.001
2016-06-07-07-00	-0.887
2016-06-07-09-00	-0.887
2016-06-07-11-00	-0.887
2016-06-07-13-00	-0.774
2016-06-07-15-00	-0.774
2016-06-07-17-00	-0.774
2016-06-07-19-00	-0.774
2016-06-07-21-00	-0.662
2016-06-07-23-00	-0.774
2016-06-08-01-00	-0.774
2016-06-08-03-00	-0.887
2016-06-08-05-00	-1.001
2016-06-08-07-00	-0.887
2016-06-08-09-00	-0.887
2016-06-08-11-00	-0.774
2016-06-08-13-00	-0.887
2016-06-08-15-00	-0.887
2016-06-08-17-00	-0.774
2016-06-08-19-00	-0.887
2016-06-08-21-00	-0.774
2016-06-08-23-00	-0.887
2016-06-09-01-00	-0.887
2016-06-09-03-00	-0.887
2016-06-09-05-00	-0.774
2016-06-09-07-00	-0.774
2016-06-09-09-00	-1.001
2016-06-09-11-00	-1.001
2016-06-09-13-00	-1.001
2016-06-09-15-00	-0.887
2016-06-09-17-00	-0.887
2016-06-09-19-00	-0.774
2016-06-09-21-00	-0.774
2016-06-09-23-00	-0.887
2016-06-10-01-00	-0.887
2016-06-10-03-00	-0.887
2016-06-10-05-00	-0.774
2016-06-10-07-00	-0.887
2016-06-10-09-00	-1.001
2016-06-10-11-00	-1.001
2016-06-10-13-00	-1.001
2016-06-10-15-00	-0.774
2016-06-10-17-00	-0.887
2016-06-10-19-00	-0.887
2016-06-10-21-00	-0.887
2016-06-10-23-00	-1.001
2016-06-11-01-00	-1.341
2016-06-11-03-00	-1.228
2016-06-11-05-00	-1.114
2016-06-11-07-00	-1.001
2016-06-11-09-00	-1.114
2016-06-11-11-00	-1.114
2016-06-11-13-00	-1.001
2016-06-11-15-00	-1.114
2016-06-11-17-00	-1.001
2016-06-11-19-00	-1.114
2016-06-11-21-00	-1.114
2016-06-11-23-00	-1.001
2016-06-12-01-00	-1.001
2016-06-12-03-00	-1.001
2016-06-12-05-00	-0.887
2016-06-12-07-00	-1.001
2016-06-12-09-00	-1.001
2016-06-12-11-00	-1.001
2016-06-12-13-00	-1.001
2016-06-12-15-00	-1.001
2016-06-12-17-00	-1.001
2016-06-12-19-00	-1.001
2016-06-12-21-00	-0.887
2016-06-12-23-00	-1.001
2016-06-13-01-00	-0.887
2016-06-13-03-00	-1.001
2016-06-13-05-00	-1.001
2016-06-13-07-00	-1.001
2016-06-13-09-00	-1.001
2016-06-13-11-00	-1.001
2016-06-13-13-00	-0.887
2016-06-13-15-00	-0.887
2016-06-13-17-00	-0.887
2016-06-13-19-00	-0.887
2016-06-13-21-00	-0.887
2016-06-13-23-00	-1.001
2016-06-14-01-00	-1.114
2016-06-14-03-00	-1.114
2016-06-14-05-00	-1.001
2016-06-14-07-00	-1.114
2016-06-14-09-00	-1.114
2016-06-14-11-00	-1.001
2016-06-14-13-00	-1.114
2016-06-14-15-00	-1.228
2016-06-14-17-00	-1.228
2016-06-14-19-00	-1.114
2016-06-14-21-00	-1.001
2016-06-14-23-00	-1.001
2016-06-15-01-00	-0.887
2016-06-15-03-00	-1.001
2016-06-15-05-00	-1.114
2016-06-15-07-00	-1.228
2016-06-15-09-00	-1.114
2016-06-15-11-00	-1.114
2016-06-15-13-00	-1.114
2016-06-15-15-00	-1.114
2016-06-15-17-00	-1.114
2016-06-15-19-00	-1.001
2016-06-15-21-00	-1.001
2016-06-15-23-00	-1.001
2016-06-16-01-00	-1.114
2016-06-16-03-00	-1.114
2016-06-16-05-00	-1.114
2016-06-16-07-00	-1.001
2016-06-16-09-00	-1.001
2016-06-16-11-00	-1.114
2016-06-16-13-00	-1.001
2016-06-16-15-00	-1.001
2016-06-16-17-00	-1.001
2016-06-16-19-00	-1.001
2016-06-16-21-00	-1.228
2016-06-16-23-00	-1.001
2016-06-17-01-00	-1.001
2016-06-17-03-00	-1.114
2016-06-17-05-00	-1.114
2016-06-17-07-00	-1.114
2016-06-17-09-00	-1.114
2016-06-17-11-00	-1.114
2016-06-17-13-00	-1.114
2016-06-17-15-00	-1.114
2016-06-17-17-00	-1.114
2016-06-17-19-00	-1.001
2016-06-17-21-00	-1.001
2016-06-17-23-00	-1.001
2016-06-18-01-00	-1.001
2016-06-18-03-00	-1.001
2016-06-18-05-00	-1.001
2016-06-18-07-00	-1.001
2016-06-18-09-00	-1.001
2016-06-18-11-00	-0.887
2016-06-18-13-00	-1.001
2016-06-18-15-00	-1.001
2016-06-18-17-00	-1.001
2016-06-18-19-00	-1.001
2016-06-18-21-00	-1.001
2016-06-18-23-00	-0.887
2016-06-19-01-00	-0.887
2016-06-19-03-00	-1.001
2016-06-19-05-00	-1.114
2016-06-19-07-00	-1.114
2016-06-19-09-00	-1.228
2016-06-19-11-00	-1.228
2016-06-19-13-00	-1.001
2016-06-19-15-00	-1.001
2016-06-19-17-00	-1.001
2016-06-19-19-00	-1.001
2016-06-19-21-00	-1.228
2016-06-19-23-00	-1.228
2016-06-20-01-00	-1.341
2016-06-20-03-00	-1.228
2016-06-20-05-00	-1.341
2016-06-20-07-00	-1.456
2016-06-20-09-00	-1.456
2016-06-20-11-00	-1.456
2016-06-20-13-00	-1.341
2016-06-20-15-00	-1.456
2016-06-20-17-00	-1.228
2016-06-20-19-00	-1.456
2016-06-20-21-00	-1.228
2016-06-20-23-00	-1.228
2016-06-21-01-00	-1.228
2016-06-21-03-00	-1.114
2016-06-21-05-00	-1.001
2016-06-21-07-00	-1.228
2016-06-21-09-00	-1.228
2016-06-21-11-00	-1.114
2016-06-21-13-00	-1.341
2016-06-21-15-00	-1.114
2016-06-21-17-00	-1.228
2016-06-21-19-00	-1.001
2016-06-21-21-00	-1.114
2016-06-21-23-00	-1.341
2016-06-22-01-00	-1.228
2016-06-22-03-00	-0.887
2016-06-22-05-00	-1.456
2016-06-22-07-00	-1.228
2016-06-22-09-00	-1.114
2016-06-22-11-00	-1.114
2016-06-22-13-00	-1.114
2016-06-22-15-00	-1.001
2016-06-22-17-00	-1.001
2016-06-22-19-00	-1.114
2016-06-22-21-00	-1.228
2016-06-22-23-00	-1.114
2016-06-23-01-00	-1.001
2016-06-23-03-00	-1.001
2016-06-23-05-00	-1.114
2016-06-23-07-00	-1.114
2016-06-23-09-00	-1.228
2016-06-23-11-00	-1.228
2016-06-23-13-00	-1.114
2016-06-23-15-00	-1.114
2016-06-23-17-00	-1.114
2016-06-23-19-00	-1.114
2016-06-23-21-00	-1.114
2016-06-23-23-00	-1.114
2016-06-24-01-00	-1.114
2016-06-24-03-00	-1.114
2016-06-24-05-00	-1.114
2016-06-24-07-00	-1.114
2016-06-24-09-00	-1.114
2016-06-24-11-00	-1.228
2016-06-24-13-00	-1.228
2016-06-24-15-00	-1.228
2016-06-24-17-00	-1.114
2016-06-24-19-00	-1.114
2016-06-24-21-00	-1.001
2016-06-24-23-00	-1.114
2016-06-25-01-00	-1.114
2016-06-25-03-00	-1.114
2016-06-25-05-00	-1.001
2016-06-25-07-00	-1.114
2016-06-25-09-00	-1.114
2016-06-25-11-00	-1.228
2016-06-25-13-00	-1.228
2016-06-25-15-00	-1.228
2016-06-25-17-00	-1.228
2016-06-25-19-00	-1.228
2016-06-25-21-00	-1.114
2016-06-25-23-00	-1.114
2016-06-26-01-00	-1.114
2016-06-26-03-00	-1.114
2016-06-26-05-00	-1.114
2016-06-26-07-00	-1.114
2016-06-26-09-00	-1.114
2016-06-26-11-00	-1.114
2016-06-26-13-00	-1.114
2016-06-26-15-00	-1.114
2016-06-26-17-00	-1.114
2016-06-26-19-00	-1.001
2016-06-26-21-00	-1.001
2016-06-26-23-00	-1.001
2016-06-27-01-00	-1.001
2016-06-27-03-00	-1.001
2016-06-27-05-00	-1.001
2016-06-27-07-00	-1.001
2016-06-27-09-00	-1.001
2016-06-27-11-00	-1.114
2016-06-27-13-00	-1.114
2016-06-27-15-00	-1.114
2016-06-27-17-00	-1.114
2016-06-27-19-00	-1.114
2016-06-27-21-00	-1.114
2016-06-27-23-00	-1.114
2016-06-28-01-00	-1.114
2016-06-28-03-00	-1.114
2016-06-28-05-00	-1.114
2016-06-28-07-00	-1.114
2016-06-28-09-00	-1.114
2016-06-28-11-00	-1.001
2016-06-28-13-00	-1.114
2016-06-28-15-00	-1.114
2016-06-28-17-00	-1.114
2016-06-28-19-00	-1.228
2016-06-28-21-00	-1.001
2016-06-28-23-00	-1.228
2016-06-29-01-00	-1.228
2016-06-29-03-00	-1.228
2016-06-29-05-00	-1.114
2016-06-29-07-00	-1.114
2016-06-29-09-00	-1.114
2016-06-29-11-00	-1.114
2016-06-29-13-00	-1.114
2016-06-29-15-00	-1.114
2016-06-29-17-00	-1.114
2016-06-29-19-00	-1.114
2016-06-29-21-00	-1.114
2016-06-29-23-00	-1.114
2016-06-30-01-00	-1.114
2016-06-30-03-00	-1.114
2016-06-30-05-00	-1.114
2016-06-30-07-00	-1.114
2016-06-30-09-00	-1.114
2016-06-30-11-00	-1.114
2016-06-30-13-00	-1.228
2016-06-30-15-00	-1.228
2016-06-30-17-00	-1.228
2016-06-30-19-00	-1.114
2016-06-30-21-00	-1.114
2016-06-30-23-00	-1.114
2016-07-01-01-00	-1.114
2016-07-01-03-00	-1.228
2016-07-01-05-00	-1.228
2016-07-01-07-00	-1.228
2016-07-01-09-00	-1.341
2016-07-01-11-00	-1.228
2016-07-01-13-00	-1.228
2016-07-01-15-00	-1.456
2016-07-01-17-00	-1.341
2016-07-01-19-00	-1.341
2016-07-01-21-00	-1.341
2016-07-01-23-00	-1.341
2016-07-02-01-00	-1.114
2016-07-02-03-00	-1.228
2016-07-02-05-00	-1.228
2016-07-02-07-00	-1.228
2016-07-02-09-00	-1.114
2016-07-02-11-00	-1.228
2016-07-02-13-00	-1.228
2016-07-02-15-00	-1.228
2016-07-02-17-00	-1.228
2016-07-02-19-00	-1.228
2016-07-02-21-00	-1.228
2016-07-02-23-00	-1.228
2016-07-03-01-00	-1.228
2016-07-03-03-00	-1.228
2016-07-03-05-00	-1.228
2016-07-03-07-00	-1.228
2016-07-03-09-00	-1.341
2016-07-03-11-00	-1.228
2016-07-03-13-00	-1.228
2016-07-03-15-00	-1.228
2016-07-03-17-00	-1.228
2016-07-03-19-00	-1.341
2016-07-03-21-00	-1.341
2016-07-03-23-00	-1.341
2016-07-04-01-00	-1.228
2016-07-04-03-00	-1.341
[truncated: 1,730 more rows]
